# Supplementary material for: Zwitterionic peptide-functionalized highly dispersed carbon nanotubes for efficient wastewater treatment
Source: Royal Society of Chemistry journal article supplement (doi:10.1039/d1tb02348a), 2021-12-31
Supplement: d1tb02348a1.pdf [file d1tb02348a1.pdf]

## Supporting Information

### **Zwitterionic peptide-functionalized highly dispersed carbon nanotubes for efficient wastewater treatment**

*Jie Huang, †<sup>a</sup> Xiaojie Sui, †<sup>a</sup> Haishan Qi, \*<sup>a</sup> Xiang Lan,<sup>a</sup> Simin Liu,<sup>a</sup> and Lei Zhang \*<sup>a</sup>*

<sup>a</sup>. Department of Biochemical Engineering, School of Chemical Engineering and Technology, Tianjin University, Tianjin 300350, PR China.

† These authors contributed equally to this work.

\* Corresponding authors.

E-mail: [hsqi@tju.edu.cn](mailto:hsqi@tju.edu.cn); [lei\\_zhang@tju.edu.cn](mailto:lei_zhang@tju.edu.cn).

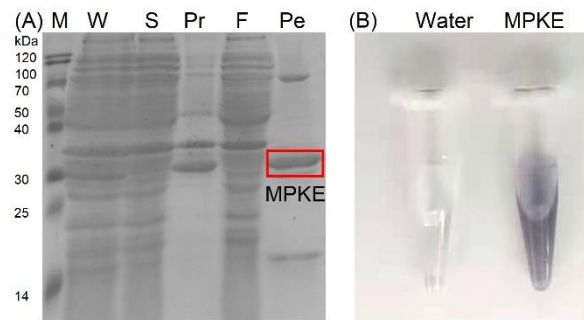

**Figure S1.** The validation of production of the MPKE protein. (A) SDS-PAGE analysis of expressed and purified MPKE. M: Marker, W: Whole Cell, S: Supernatant, Pr: Precipitate, F: Flow, Pe: Peak (B) NBT staining results of the protein solution.

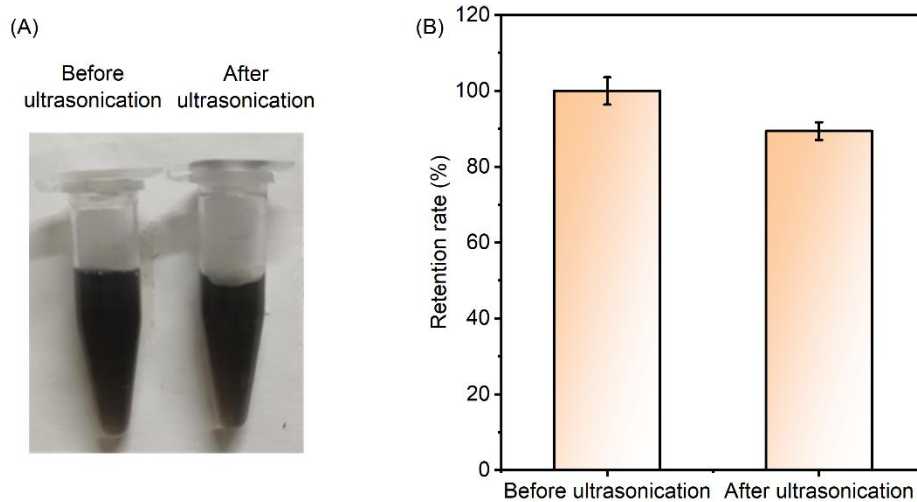

**Figure S2.** (A) Images and (B) retention rate of MPKE-MWCNTs before or after ultrasonication for 30 min.

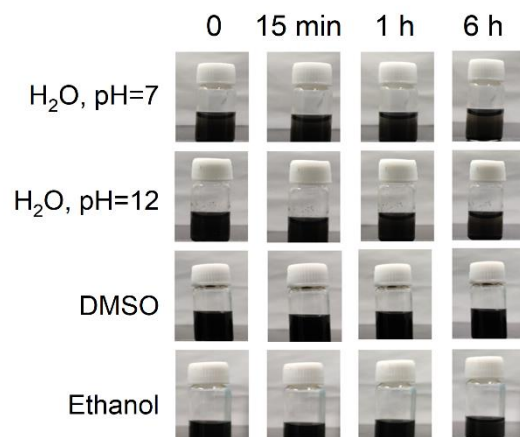

**Figure S3.** Dispersion stability at room temperature for different time of MPKE-MWCNTs in the water solutions with pH=7 or pH=12, DMSO and Ethanol, respectively.

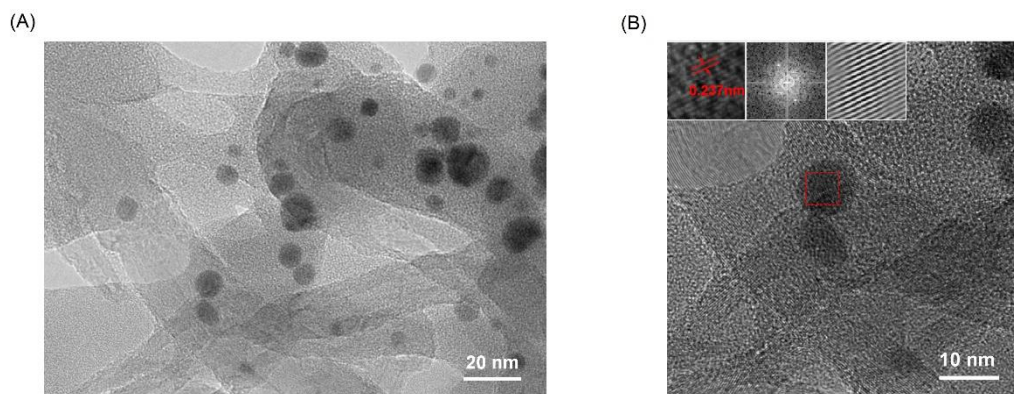

**Figure S4.** (A and B) TEM images of the AgNPs@MPKE-MWCNTs. The red arrow was a lattice fringe with a 0.237 nm interplanar distance.

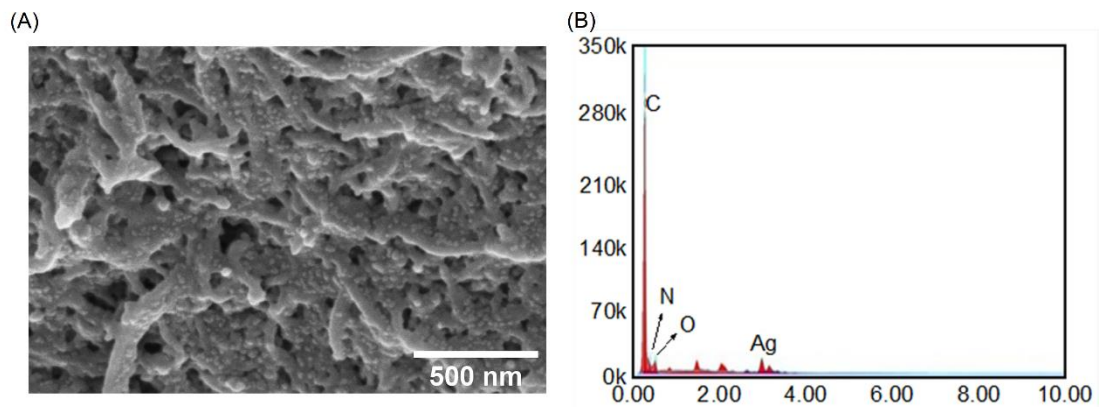

**Figure S5.** Characterization of AgNPs@MPKE-MWCNTs. (A) The SEM image of AgNPs@MPKE-MWCNTs. (B) The EDS result of AgNPs@MPKE-MWCNTs.

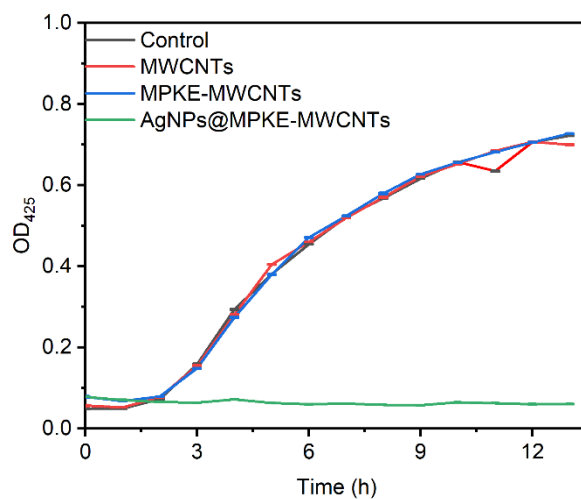

**Figure S6.** The growth curves of *E. coli* incubated with medium (Control), MWCNTs, MPKE-MWCNTs, AgNPs@MPKE-MWCNTs that stored in water for two months, respectively.
